# Supplementary material for: Design and Validity of Randomized Controlled Dental Restorative Trials
Source: PubMed Central journal article supplement (PMC5503090; doi:10.3390/ma9050372), 2016-05-13
Supplement: materials-09-00372-s001.pdf [file materials-09-00372-s001.pdf]

# Supplementary Materials: Design and Validity of Randomized Controlled Dental Restorative Trials

Gerd Göstemeyer, Uwe Blunck, Sebastian Paris and Falk Schwendicke

Table S1. Included studies.

| Trial ID                    | Number of Patients | Lesions per Patient | Number of Lesions | Follow-Up in Months | % Lesions Retained at Follow-Up | Cavity Class | Indication             | Dentition | Setting   | Super/Inferiority Hypothesized | Samplesize Calculation Described | Unit of Randomization | Analysis Considering Attrition | Trial Registration | Outcome Measure | Significant Differences |
|-----------------------------|--------------------|---------------------|-------------------|---------------------|---------------------------------|--------------|------------------------|-----------|-----------|--------------------------------|----------------------------------|-----------------------|--------------------------------|--------------------|-----------------|-------------------------|
| Adeleke 2012 [1]            | 44                 | 7.6                 | 336               | 12                  | 85.4                            | V            | non-carious            | permanent | secondary | no                             | no                               | pairwise              | not performed                  | no                 | USPHS           | yes                     |
| Ahrari 2010 [2]             | 36                 | 1.0                 | 36                | 12                  | 86.1                            | II           | not reported           | permanent | secondary | no                             | no                               | toothwise             | not performed                  | no                 | USPHS           | no                      |
| Alves dos Santos 2010 [3]   | 48                 | 2.9                 | 141               | 48                  | 80.9                            | II           | carious                | primary   | secondary | no                             | no                               | pairwise              | not performed                  | no                 | USPHS           | no                      |
| Andersson-Wenckert 2006 [4] | 61                 | 3.1                 | 190               | 24                  | 76.8                            | II           | carious                | primary   | primary   | no                             | no                               | pairwise              | not performed                  | no                 | USPHS           | no                      |
| Aw 2005 [5]                 | 57                 | 3.0                 | 171               | 36                  | 85.4                            | V            | non-carious            | permanent | secondary | no                             | no                               | pairwise              | not performed                  | no                 | USPHS           | no                      |
| Baracco 2013 [6]            | 25                 | 3.0                 | 75                | 24                  | 96.0                            | I            | carious or replacement | permanent | secondary | no                             | no                               | pairwise              | not performed                  | no                 | USPHS           | no                      |
| Beck 2014 [7]               | 456                | 4.0                 | 1805              | 12                  | 61.4                            | II           | carious or replacement | permanent | secondary | no                             | no                               | toothwise             | not performed                  | no                 | USPHS           | no                      |
| Blunck 2007 [8]             | 40                 | 2.0                 | 80                | 6                   | 95.0                            | V            | non-carious            | permanent | secondary | no                             | no                               | pairwise              | not performed                  | no                 | USPHS           | no                      |
| Boeckler 2012 [9]           | 50                 | 2.0                 | 100               | 48                  | 60.0                            | II           | carious or replacement | permanent | secondary | no                             | no                               | pairwise              | not performed                  | no                 | USPHS           | no                      |
| Bottenberg 2009 [10]        | 32                 | 4.0                 | 128               | 60                  | 60.2                            | II           | carious                | Permanent | secondary | no                             | no                               | toothwise             | not performed                  | no                 | USPHS           | no                      |
| Brackett 2007 [11]          | 50                 | 1.0                 | 50                | 18                  | 100.0                           | II           | carious or replacement | permanent | secondary | no                             | no                               | toothwise             | not required                   | no                 | USPHS           | no                      |
| Brackett 2010 [12]          | 14                 | 5.7                 | 80                | 24                  | 92.5                            | V            | non-carious            | permanent | secondary | no                             | no                               | pairwise              | not performed                  | no                 | USPHS           | no                      |
| Burgess 2013 [13]           | 52                 | 3.0                 | 156               | 24                  | 75.0                            | V            | non-carious            | permanent | secondary | yes                            | no                               | pairwise              | not performed                  | no                 | USPHS           | no                      |
| Burrow 2007 [14]            | 20                 | 4.6                 | 92                | 36                  | 59.8                            | V            | non-carious            | permanent | secondary | no                             | no                               | toothwise             | not performed                  | no                 | other           | yes                     |
| Burrow 2012 [15]            | 11                 | 5.5                 | 60                | 36                  | 90.0                            | V            | non-carious            | permanent | secondary | no                             | no                               | pairwise              | not performed                  | no                 | other           | no                      |
| Casagrande 2013 [16]        | 66                 | 2.0                 | 132               | 18                  | 93.2                            | II           | carious                | primary   | secondary | no                             | yes                              | toothwise             | not performed                  | yes                | USPHS           | no                      |
| Cehreli 2006 [17]           | 84                 | 2.4                 | 200               | 24                  | 76.0                            | I, II        | carious                | primary   | secondary | no                             | no                               | pairwise              | not performed                  | no                 | USPHS           | no                      |
| Celik 2007 [18]             | 37                 | 6.8                 | 252               | 24                  | 59.1                            | V            | non-carious            | permanent | secondary | no                             | no                               | pairwise              | not performed                  | no                 | USPHS           | yes                     |
| Celik 2014 [19]             | 31                 | 2.6                 | 82                | 36                  | 75.6                            | II           | carious                | permanent | secondary | no                             | no                               | pairwise              | not performed                  | no                 | USPHS           | no                      |
| Cetin 2013 [20]             | 54                 | 1.2                 | 67                | 60                  | 67.2                            | I            | carious or replacement | permanent | secondary | no                             | no                               | pairwise              | not required                   | no                 | USPHS           | no                      |

Table S1. Cont.

| Trial ID                        | Number of Patients | Lesions per Patient | Number of Lesions | Follow-Up in Months | % Lesions Retained at Follow-Up | Cavity Class | Indication             | Dentition    | Setting   | Super/Inferiority Hypothesized | Sample Size Calculation Described | Unit of Randomization | Analysis Considering Attrition | Trial Registration | Outcome Measure | Significant Differences |
|---------------------------------|--------------------|---------------------|-------------------|---------------------|---------------------------------|--------------|------------------------|--------------|-----------|--------------------------------|-----------------------------------|-----------------------|--------------------------------|--------------------|-----------------|-------------------------|
| Dalton Bittencourt 2005 [21]    | 25                 | 3.1                 | 78                | 18                  | 76.9                            | V            | non-carious            | permanent    | secondary | no                             | no                                | pairwise              | not performed                  | no                 | USPHS           | no                      |
| Daou 2009 [22]                  | 45                 | 3.3                 | 149               | 24                  | 62.4                            | I            | carious or replacement | primary      | secondary | no                             | no                                | toothwise             | not performed                  | no                 | USPHS           | no                      |
| Daou 2009 [23]                  | 20                 | 2.0                 | 40                | 36                  | 60.0                            | I            | carious                | primary      | secondary | no                             | no                                | pairwise              | not performed                  | no                 | USPHS           | no                      |
| de Andrade 2014 [24]            | 41                 | 3.0                 | 123               | 54                  | 75.6                            | I            | carious or replacement | permanent    | secondary | no                             | yes                               | pairwise              | not performed                  | no                 | USPHS           | yes                     |
| Delbons 2015 [25]               | 80                 | 1.8                 | 144               | 18                  | 95.1                            | I, II        | carious or replacement | permanent    | primary   | no                             | no                                | pairwise              | not performed                  | no                 | USPHS           | no                      |
| Deliperi 2012 [26]              | 50                 | 1.5                 | 75                | 24                  | 61.3                            | II           | carious or replacement | permanent    | primary   | no                             | no                                | toothwise             | not performed                  | no                 | USPHS           | no                      |
| Demirci 2008 [27]               | 32                 | 3.0                 | 96                | 24                  | 90.6                            | III          | carious                | permanent    | secondary | no                             | no                                | pairwise              | not performed                  | no                 | USPHS           | no                      |
| Dall'Orologio 2014 [28]         | 50                 | 3.0                 | 150               | 96                  | 53.3                            | V            | non-carious            | permanent    | secondary | no                             | yes                               | pairwise              | not performed                  | no                 | USPHS           | no                      |
| Dresch 2006 [29]                | 37                 | 4.0                 | 148               | 12                  | 100.0                           | V            | non-carious            | permanent    | secondary | no                             | no                                | pairwise              | not required                   | no                 | USPHS           | no                      |
| Dunne 2005 [30]                 | 14                 | 3.6                 | 50                | 36                  | 94.0                            | I, II        | carious or replacement | permanent    | secondary | no                             | no                                | toothwise             | not performed                  | no                 | other           | yes                     |
| Dutra-Correa 2013 [31]          | 37                 | 3.2                 | 120               | 18                  | 76.7                            | V            | non-carious            | permanent    | secondary | no                             | no                                | pairwise              | not performed                  | no                 | USPHS           | no                      |
| Efes 2006 [32]                  | 54                 | 2.0                 | 108               | 24                  | 92.6                            | I            | carious                | permanent    | secondary | no                             | no                                | pairwise              | not performed                  | no                 | USPHS           | no                      |
| Efes 2006 [33]                  | 90                 | 1.0                 | 90                | 24                  | 97.8                            | I            | carious                | permanent    | secondary | no                             | no                                | toothwise             | not performed                  | no                 | USPHS           | no                      |
| Efes 2013 [34]                  | 50                 | 2.0                 | 100               | 24                  | 100.0                           | I            | carious or replacement | permanent    | secondary | no                             | no                                | pairwise              | not required                   | no                 | USPHS           | no                      |
| Eliguzeloglu Dalkilic 2012 [35] | 29                 | 8.7                 | 252               | 24                  | 62.7                            | V            | non-carious            | permanent    | secondary | no                             | no                                | toothwise             | not performed                  | no                 | USPHS           | no                      |
| Ergücü 2007 [36]                | 30                 | 3.2                 | 96                | 18                  | 93.8                            | I            | carious or replacement | permanent    | secondary | no                             | no                                | pairwise              | not performed                  | no                 | USPHS           | no                      |
| Ermis 2012 [37]                 | 26                 | 6.2                 | 161               | 24                  | 93.2                            | V            | non-carious            | permanent    | secondary | no                             | no                                | toothwise             | not performed                  | no                 | other           | no                      |
| Ernst 2006 [38]                 | 50                 | 2.2                 | 112               | 24                  | 100.0                           | II           | carious or replacement | permanent    | secondary | no                             | no                                | pairwise              | not required                   | no                 | USPHS           | no                      |
| Ertugrul 2010 [39]              | 98                 | 2.0                 | 196               | 12                  | 87.2                            | II           | carious                | primary      | secondary | no                             | yes                               | pairwise              | not performed                  | no                 | USPHS           | no                      |
| Fagundes 2009 [40]              | 33                 | 2.0                 | 66                | 60                  | 90.9                            | II           | carious or replacement | permanent    | secondary | no                             | no                                | pairwise              | not performed                  | no                 | USPHS           | no                      |
| Frankenberger 2014 [41]         | 30                 | 2.3                 | 68                | 96                  | 98.5                            | II           | carious or replacement | permanent    | secondary | no                             | yes                               | pairwise              | not performed                  | no                 | USPHS           | no                      |
| Gallo 2010 [42]                 | 23                 | 2.7                 | 63                | 36                  | 92.1                            | I            | carious                | not reported | secondary | no                             | yes                               | toothwise             | not performed                  | no                 | USPHS           | no                      |

Table S1. Cont.

| Trial ID                  | Number of Patients | Lesions per Patient | Number of Lesions | Follow-Up in Months | % Lesions Retained at Follow-Up | Cavity Class | Indication             | Dentition | Setting   | Super/Inferiority Hypothesized | Sample Size Calculation Described | Unit of Randomization | Analysis Considering Attrition | Trial Registration | Outcome Measure | Significant Differences |
|---------------------------|--------------------|---------------------|-------------------|---------------------|---------------------------------|--------------|------------------------|-----------|-----------|--------------------------------|-----------------------------------|-----------------------|--------------------------------|--------------------|-----------------|-------------------------|
| Gianordoli Neto 2008 [43] | 30                 | 2.3                 | 70                | 12                  | 100.0                           | II           | carious or replacement | permanent | secondary | no                             | no                                | pairwise              | not required                   | no                 | USPHS           | no                      |
| Goncalves 2013 [44]       | 33                 | 3.0                 | 100               | 18                  | 88.0                            | II           | carious or replacement | permanent | secondary | no                             | yes                               | toothwise             | not performed                  | no                 | USPHS           | no                      |
| Gresnigt 2012 [45]        | 23                 | 4.2                 | 96                | 41                  | 87.5                            | IV           | non-carious            | permanent | secondary | no                             | no                                | pairwise              | not required                   | no                 | USPHS           | no                      |
| Häfer 2013 [46]           | 35                 | 2.6                 | 90                | 48                  | 98.9                            | III          | carious or replacement | permanent | secondary | no                             | no                                | pairwise              | not performed                  | no                 | USPHS           | no                      |
| Häfer 2015 [47]           | 40                 | 2.8                 | 110               | 36                  | 74.5                            | V            | non-carious            | permanent | secondary | no                             | no                                | pairwise              | not performed                  | no                 | other           | yes                     |
| Jyothi 2011 [48]          | 32                 | 2.5                 | 80                | 12                  | 100.0                           | V            | non-carious            | permanent | secondary | no                             | yes                               | pairwise              | not required                   | no                 | USPHS           | yes                     |
| Karaman 2012 [49]         | 21                 | 6.4                 | 134               | 24                  | 100.0                           | V            | non-carious            | permanent | secondary | yes                            | no                                | pairwise              | not performed                  | no                 | USPHS           | no                      |
| Kim 2009 [50]             | 39                 | 3.8                 | 150               | 24                  | 81.3                            | V            | non-carious            | permanent | secondary | no                             | no                                | pairwise              | not performed                  | no                 | USPHS           | yes                     |
| Koubi 2006 [51]           | 14                 | 4.0                 | 56                | 12                  | 100.0                           | V            | non-carious            | permanent | secondary | no                             | no                                | pairwise              | not required                   | no                 | USPHS           | yes                     |
| Krämer 2006 [52]          | 30                 | 2.4                 | 71                | 48                  | 66.2                            | II           | not reported           | permanent | secondary | no                             | no                                | clusterwise           | not performed                  | no                 | USPHS           | yes                     |
| Kubo 2006 [53]            | 8                  | 9.0                 | 72                | 60                  | 98.6                            | V            | non-carious            | permanent | secondary | no                             | no                                | pairwise              | not performed                  | no                 | USPHS           | no                      |
| Kubo 2009 [54]            | 23                 | 4.7                 | 108               | 24                  | 99.1                            | V            | non-carious            | permanent | secondary | no                             | no                                | pairwise              | not performed                  | no                 | USPHS           | no                      |
| Kubo 2010 [55]            | 22                 | 4.5                 | 98                | 36                  | 98.0                            | V            | non-carious            | permanent | secondary | no                             | no                                | pairwise              | not performed                  | no                 | USPHS           | no                      |
| Kurokawa 2007 [56]        | 46                 | 2.1                 | 98                | 12                  | 100.0                           | V            | non-carious            | permanent | secondary | no                             | no                                | toothwise             | not required                   | no                 | USPHS           | no                      |
| Logueicio 2007 [57]       | 25                 | 3.1                 | 78                | 36                  | 76.9                            | V            | non-carious            | permanent | secondary | no                             | yes                               | pairwise              | not performed                  | no                 | USPHS           | no                      |
| Loguercio 2007 [58]       | 38                 | 3.0                 | 114               | 12                  | 100.0                           | III          | carious                | permanent | secondary | no                             | no                                | pairwise              | not required                   | no                 | USPHS           | yes                     |
| Mahmoud 2008 [59]         | 40                 | 3.5                 | 140               | 24                  | 100.0                           | I            | carious or replacement | permanent | secondary | no                             | no                                | pairwise              | not performed                  | no                 | USPHS           | no                      |
| Mahmoud 2014 [60]         | 40                 | 4.0                 | 160               | 36                  | 100.0                           | I            | carious or replacement | permanent | secondary | no                             | no                                | pairwise              | not required                   | no                 | USPHS           | no                      |
| Mahmoud 2014 [61]         | 78                 | 2.0                 | 156               | 36                  | 100.0                           | II           | carious                | permanent | secondary | no                             | no                                | pairwise              | not performed                  | no                 | USPHS           | no                      |
| Manhart 2010 [62]         | 43                 | 2.2                 | 96                | 48                  | 83.3                            | II           | carious or replacement | permanent | secondary | no                             | no                                | toothwise             | not performed                  | no                 | USPHS           | no                      |
| Monteiro 2010 [63]        | 26                 | 4.0                 | 105               | 24                  | 58.1                            | II           | carious                | permanent | secondary | no                             | no                                | pairwise              | not performed                  | no                 | USPHS           | no                      |
| Moosavi 2013 [64]         | 30                 | 3.0                 | 90                | 18                  | 91.1                            | V            | non-carious            | permanent | secondary | no                             | no                                | pairwise              | not performed                  | no                 | USPHS           | no                      |
| Moretto 2013 [65]         | 30                 | 5.8                 | 175               | 36                  | 89.7                            | V            | non-carious            | permanent | secondary | no                             | no                                | toothwise             | not performed                  | no                 | other           | no                      |
| Pascon 2006 [66]          | 30                 | 2.3                 | 70                | 24                  | 85.7                            | I            | carious                | primary   | secondary | no                             | no                                | pairwise              | not performed                  | no                 | USPHS           | yes                     |
| Paula 2015 [67]           | 35                 | 5.1                 | 180               | 12                  | 100.0                           | V            | non-carious            | permanent | secondary | yes                            | yes                               | pairwise              | not required                   | no                 | USPHS and other | no                      |

Table S1. Cont.

| Trial ID                | Number of Patients | Lesions per Patient | Number of Lesions | Follow-Up in Months | % Lesions Retained at Follow-Up | Cavity Class | Indication                            | Dentition | Setting   | Super/Infer-Ority Hypothesized | Samplesize Calculation Described | Unit of Randomization | Analysis Considering Attrition | Trial Registration | Outcome Measure | Significant Differences |
|-------------------------|--------------------|---------------------|-------------------|---------------------|---------------------------------|--------------|---------------------------------------|-----------|-----------|--------------------------------|----------------------------------|-----------------------|--------------------------------|--------------------|-----------------|-------------------------|
| Pazinatto 2012 [68]     | 33                 | 2.7                 | 90                | 56                  | 74.4                            | I            | carious or replacement                | permanent | secondary | no                             | no                               | pairwise              | not performed                  | no                 | USPHS           | no                      |
| Perdigao 2005 [69]      | 35                 | 3.7                 | 128               | 18                  | 85.9                            | V            | non-carious                           | permanent | secondary | no                             | no                               | toothwise             | not performed                  | no                 | USPHS           | no                      |
| Perdigao 2009 [70]      | 38                 | 3.2                 | 121               | 24                  | 75.2                            | II           | carious or replacement                | permanent | secondary | no                             | no                               | pairwise              | not performed                  | no                 | USPHS           |                         |
| Perdigao 2012 [71]      | 39                 | 3.2                 | 125               | 18                  | 77.6                            | V            | non-carious                           | permanent | secondary | no                             | no                               | pairwise              | not performed                  | no                 | USPHS           | no                      |
| Perdigao 2012 [72]      | 33                 | 2.8                 | 92                | 12                  | 84.8                            | V            | non-carious                           | permanent | secondary | no                             | no                               | toothwise             | not performed                  | no                 | USPHS           | no                      |
| Peumans 2012 [73]       | 71                 | 2.0                 | 142               | 156                 | 68.3                            | V            | non-carious                           | permanent | secondary | no                             | no                               | pairwise              | not performed                  | no                 | other           | yes                     |
| Pollington 2008 [74]    | 30                 | 2.0                 | 60                | 36                  | 100.0                           | V            | non-carious                           | permanent | secondary | no                             | no                               | pairwise              | not required                   | no                 | USPHS           | no                      |
| Poon 2005 [75]          | 65                 | 1.5                 | 98                | 43                  | 55.1                            | I            | carious                               | permanent | secondary | no                             | no                               | clusterwise           | not performed                  | no                 | USPHS           | no                      |
| Qin 2013 [76]           | 46                 | 2.5                 | 116               | 24                  | 96.6                            | V            | non-carious                           | permanent | secondary | no                             | no                               | pairwise              | not performed                  | no                 | USPHS           | no                      |
| Reis 2009 [77]          | 30                 | 4.0                 | 120               | 18                  | 100.0                           | V            | non-carious                           | permanent | secondary | no                             | yes                              | pairwise              | not required                   | no                 | USPHS           | yes                     |
| Reis 2009 [78]          | 84                 | 1.0                 | 84                | 36                  | 92.9                            | V            | non-carious                           | permanent | secondary | no                             | no                               | toothwise             | not performed                  | no                 | USPHS           | yes                     |
| Ritter 2009 [79]        | 33                 | 3.0                 | 99                | 96                  | 56.6                            | V            | non-carious                           | permanent | secondary | yes                            | yes                              | toothwise             | not performed                  | no                 | USPHS           | no                      |
| Saboia 2006 [80]        | 14                 | 4.0                 | 56                | 24                  | 73.2                            | V            | non-carious                           | permanent | secondary | no                             | no                               | pairwise              | not performed                  | no                 | USPHS           | no                      |
| Sadeghi 2010 [81]       | 35                 | 3.0                 | 105               | 18                  | 100.0                           | I            | carious                               | permanent | secondary | no                             | no                               | pairwise              | not required                   | no                 | USPHS           | no                      |
| Santiago 2010 [82]      | 30                 | 2.3                 | 70                | 60                  | 78.6                            | V            | non-carious                           | permanent | secondary | no                             | no                               | pairwise              | not performed                  | no                 | USPHS           | yes                     |
| Schattenberg 2008 [83]  | 50                 | 2.1                 | 104               | 24                  | 100.0                           | V            | carious or non-carious or replacement | permanent | secondary | no                             | no                               | pairwise              | not performed                  | no                 | USPHS           | no                      |
| Schirrmeister 2009 [84] | 43                 | 2.0                 | 86                | 48                  | 62.8                            | II           | carious                               | permanent | secondary | no                             | no                               | pairwise              | not performed                  | no                 | USPHS           | no                      |
| Schmidt 2014 [85]       | 72                 | 2.2                 | 158               | 60                  | 67.7                            | II           | carious or replacement                | permanent | secondary | no                             | yes                              | pairwise              | not performed                  | yes                | other           | no                      |
| Shi 2010 [86]           | 32                 | 3.1                 | 100               | 36                  | 80.0                            | I            | carious or replacement                | permanent | secondary | no                             | yes                              | pairwise              | not performed                  | no                 | USPHS           | no                      |
| Söderholm 2013 [87]     | 21                 | 4.0                 | 84                | 48                  | 78.6                            | V            | non-carious                           | permanent | secondary | no                             | yes                              | pairwise              | not performed                  | no                 | USPHS           | no                      |
| Stojanac 2013 [88]      | 30                 | 3.0                 | 90                | 24                  | 100.0                           | V            | non-carious                           | permanent | secondary | no                             | no                               | pairwise              | not performed                  | no                 | USPHS           | no                      |
| Torres 2010 [89]        | 20                 | 2.0                 | 39                | 36                  | 100.0                           | II           | carious or replacement                | permanent | secondary | no                             | no                               | toothwise             | not performed                  | no                 | USPHS           | no                      |
| Tuncer 2013 [90]        | 24                 | 5.1                 | 123               | 24                  | 100.8                           | V            | non-carious                           | permanent | secondary | no                             | no                               | pairwise              | not required                   | no                 | USPHS           | yes                     |
| Tuncer 2014 [91]        | 20                 | 4.9                 | 97                | 12                  | 100.0                           | V            | non-carious                           | permanent | secondary | no                             | no                               | pairwise              | not required                   | no                 | USPHS           | no                      |
| Türkün 2005 [92]        | 35                 | 4.7                 | 163               | 12                  | 100.0                           | V            | non-carious                           | permanent | secondary | no                             | no                               | pairwise              | not required                   | no                 | USPHS           | no                      |
| Türkün 2008 [93]        | 24                 | 4.2                 | 100               | 24                  | 100.0                           | V            | non-carious                           | permanent | secondary | no                             | no                               | pairwise              | not performed                  | no                 | USPHS           | no                      |
| Turner 2008 [94]        | 14                 | 4.0                 | 56                | 24                  | 96.4                            | V            | non-carious                           | permanent | secondary | no                             | no                               | pairwise              | not performed                  | no                 | USPHS           | no                      |

Table S1. Cont.

| Trial ID                 | Number of Patients | Lesions per Patient | Number of Lesions | Follow-Up in Months | % Lesions Retained at Follow-Up | Cavity Class | Indication             | Dentition | Setting   | Super/Inferiority Hypothesized | Sample Size Calculation Described | Unit of Randomization | Analysis Considering Attrition | Trial Registration | Outcome Measure | Significant Differences |
|--------------------------|--------------------|---------------------|-------------------|---------------------|---------------------------------|--------------|------------------------|-----------|-----------|--------------------------------|-----------------------------------|-----------------------|--------------------------------|--------------------|-----------------|-------------------------|
| van Dijken 2005 [95]     | 35                 | 2.1                 | 73                | 72                  | 91.8                            | V            | non-carious            | permanent | secondary | no                             | no                                | toothwise             | not performed                  | no                 | USPHS           | yes                     |
| van Dijken 2006 [96]     | 63                 | 1.4                 | 87                | 72                  | 86.2                            | II           | replacement            | permanent | secondary | no                             | no                                | toothwise             | not performed                  | no                 | USPHS           | yes                     |
| van Dijken 2007 [97]     | 119                | 2.8                 | 337               | 156                 | 81.6                            | V            | non-carious            | permanent | secondary | no                             | no                                | toothwise             | not performed                  | no                 | USPHS           | yes                     |
| van Dijken 2008 [98]     | 88                 | 3.1                 | 270               | 156                 | 79.6                            | V            | non-carious            | permanent | secondary | no                             | no                                | toothwise             | not performed                  | no                 | USPHS           | yes                     |
| van Dijken 2009 [99]     | 50                 | 2.1                 | 106               | 60                  | 91.5                            | II           | carious or replacement | permanent | secondary | yes                            | no                                | pairwise              | not performed                  | no                 | USPHS           | no                      |
| van Dijken 2010 [100]    | 72                 | 1.7                 | 119               | 96                  | 102.5                           | V            | non-carious            | permanent | secondary | no                             | no                                | toothwise             | not performed                  | no                 | USPHS           | no                      |
| van Dijken 2012 [101]    | 60                 | 2.3                 | 139               | 84                  | 97.1                            | V            | non-carious            | permanent | secondary | no                             | no                                | toothwise             | not performed                  | no                 | USPHS           | no                      |
| van Dijken 2013 [102]    | 67                 | 2.5                 | 169               | 60                  | 95.3                            | V            | non-carious            | permanent | secondary | no                             | no                                | pairwise              | not performed                  | no                 | USPHS           | yes                     |
| van Dijken 2013 [103]    | 54                 | 2.1                 | 115               | 72                  | 96.5                            | II           | carious or replacement | permanent | secondary | no                             | no                                | pairwise              | not performed                  | no                 | USPHS           | no                      |
| van Dijken 2014 [104]    | 38                 | 2.8                 | 106               | 36                  | 98.1                            | II           | carious or replacement | permanent | secondary | no                             | yes                               | pairwise              | not performed                  | no                 | USPHS           | no                      |
| van Dijken 2014 [105]    | 78                 | 2.1                 | 165               | 96                  | 95.8                            | II           | carious or replacement | permanent | secondary | no                             | no                                | toothwise             | not performed                  | no                 | USPHS           | no                      |
| van Dijken 2014 [106]    | 52                 | 2.3                 | 122               | 120                 | 93.4                            | II           | carious or replacement | permanent | secondary | no                             | no                                | pairwise              | not performed                  | no                 | USPHS           | no                      |
| van Dijken 2015 [107]    | 82                 | 2.4                 | 196               | 96                  | 98.0                            | II           | carious or replacement | permanent | secondary | no                             | yes                               | pairwise              | not performed                  | no                 | USPHS           | no                      |
| van Landuyt 2014 [108]   | 52                 | 5.1                 | 267               | 60                  | 89.9                            | V            | non-carious            | permanent | secondary | no                             | no                                | pairwise              | not performed                  | no                 | other           | no                      |
| Yaman 2014 [109]         | 24                 | 6.0                 | 144               | 36                  | 83.3                            | V            | non-carious            | permanent | secondary | no                             | no                                | pairwise              | not performed                  | no                 | USPHS           | yes                     |
| Yazici 2014 [110]        | 28                 | 3.0                 | 84                | 36                  | 71.4                            | I            | carious                | permanent | secondary | no                             | no                                | pairwise              | not performed                  | no                 | USPHS           | no                      |
| Zander-Grande 2011 [111] | 40                 | 4.0                 | 160               | 24                  | 100.0                           | V            | non-carious            | permanent | secondary | no                             | yes                               | pairwise              | not required                   | no                 | USPHS           | no                      |
| Zander-Grande 2014 [112] | 31                 | 4.0                 | 124               | 24                  | 90.3                            | V            | non-carious            | Permanent | secondary | yes                            | yes                               | pairwise              | performed                      | no                 | other           | yes                     |
| Zhou 2009 [113]          | 124                | 2.8                 | 342               | 12                  | 95.9                            | V            | non-carious            | permanent | secondary | no                             | no                                | pairwise              | not performed                  | no                 | USPHS           | no                      |
| Zulfikaroglu 2008 [114]  | 51                 | 1.5                 | 75                | 12                  | 81.3                            | II           | Pulpectomized          | primary   | secondary | no                             | no                                | toothwise             | not performed                  | no                 | USPHS           | yes                     |

Table S2. Risk of bias.

| Trial ID                        | Sequence Generation | Allocation Concealment | Blinding of Operator | Blinding of Examiner | Incomplete Data | Selective Reporting | Overall Risk of Bias |
|---------------------------------|---------------------|------------------------|----------------------|----------------------|-----------------|---------------------|----------------------|
| Adeleke 2012 [1]                | low                 | unclear                | high                 | unclear              | high            | high                | unclear/high         |
| Ahrari 2010 [2]                 | unclear             | unclear                | high                 | unclear              | low             | low                 | unclear/high         |
| Alves dos Santos 2010 [3]       | low                 | unclear                | high                 | unclear              | low             | low                 | unclear/high         |
| Andersson-Wenckert 2006 [4]     | unclear             | unclear                | high                 | high                 | low             | low                 | unclear/high         |
| Aw 2005 [5]                     | unclear             | unclear                | high                 | unclear              | low             | low                 | unclear/high         |
| Baracco 2013 [6]                | unclear             | unclear                | high                 | low                  | low             | low                 | unclear/high         |
| Beck 2014 [7]                   | low                 | low                    | high                 | unclear              | low             | low                 | unclear/high         |
| Blunck 2007 [8]                 | unclear             | unclear                | high                 | unclear              | low             | low                 | unclear/high         |
| Boeckler 2012 [9]               | unclear             | unclear                | high                 | low                  | low             | low                 | unclear/high         |
| Bottenberg 2009 [10]            | low                 | low                    | high                 | low                  | high            | low                 | unclear/high         |
| Brackett 2007 [11]              | unclear             | unclear                | high                 | low                  | high            | low                 | unclear/high         |
| Brackett 2010 [12]              | unclear             | unclear                | high                 | low                  | low             | low                 | unclear/high         |
| Burgess 2013 [13]               | unclear             | unclear                | high                 | low                  | high            | low                 | unclear/high         |
| Burrow 2007 [14]                | low                 | unclear                | high                 | unclear              | low             | low                 | unclear/high         |
| Burrow 2012 [15]                | unclear             | unclear                | high                 | unclear              | low             | low                 | unclear/high         |
| Casagrande 2013 [16]            | low                 | unclear                | high                 | unclear              | high            | low                 | unclear/high         |
| Cehreli 2006 [17]               | unclear             | unclear                | high                 | low                  | low             | low                 | unclear/high         |
| Celik 2007 [18]                 | unclear             | unclear                | high                 | unclear              | high            | low                 | unclear/high         |
| Celik 2014 [19]                 | low                 | unclear                | high                 | low                  | low             | low                 | unclear/high         |
| Cetin 2013 [20]                 | low                 | unclear                | high                 | low                  | low             | low                 | unclear/high         |
| Dalton Bittencourt 2005 [21]    | unclear             | unclear                | high                 | unclear              | low             | low                 | unclear/high         |
| Daou 2009 [22]                  | unclear             | unclear                | high                 | unclear              | low             | low                 | unclear/high         |
| Daou 2009 [23]                  | unclear             | unclear                | high                 | high                 | high            | low                 | unclear/high         |
| de Andrade 2014 [24]            | low                 | low                    | low                  | unclear              | low             | low                 | unclear/high         |
| Delbons 2015 [25]               | unclear             | low                    | high                 | unclear              | low             | low                 | unclear/high         |
| Deliperi 2012 [26]              | unclear             | unclear                | high                 | low                  | low             | low                 | unclear/high         |
| Demirci 2008 [27]               | unclear             | unclear                | high                 | unclear              | low             | low                 | unclear/high         |
| Dall'Orologio 2014 [28]         | low                 | low                    | high                 | unclear              | low             | low                 | unclear/high         |
| Dresch 2006 [29]                | low                 | unclear                | high                 | low                  | low             | low                 | unclear/high         |
| Dunne 2005 [30]                 | unclear             | high                   | high                 | unclear              | low             | low                 | unclear/high         |
| Dutra-Correa 2013 [31]          | unclear             | unclear                | high                 | low                  | low             | low                 | unclear/high         |
| Efes 2006 [32]                  | unclear             | unclear                | high                 | unclear              | low             | low                 | unclear/high         |
| Efes 2006 [33]                  | unclear             | unclear                | high                 | unclear              | low             | low                 | unclear/high         |
| Efes 2013 [34]                  | low                 | unclear                | high                 | low                  | low             | low                 | unclear/high         |
| Eliguzeloglu Dalkilic 2012 [35] | unclear             | unclear                | high                 | unclear              | low             | low                 | unclear/high         |
| Ergücü 2007 [36]                | unclear             | unclear                | high                 | unclear              | low             | low                 | unclear/high         |
| Ermis 2012 [37]                 | low                 | unclear                | high                 | low                  | low             | low                 | unclear/high         |
| Ernst 2006 [38]                 | unclear             | unclear                | high                 | unclear              | high            | low                 | unclear/high         |

Table S2. Cont.

| Trial ID                  | Sequence Generation | Allocation Concealment | Blinding of Operator | Blinding of Examiner | Incomplete Data | Selective Reporting | Overall Risk of Bias |
|---------------------------|---------------------|------------------------|----------------------|----------------------|-----------------|---------------------|----------------------|
| Ertugrul 2010 [39]        | low                 | unclear                | high                 | high                 | high            | low                 | unclear/high         |
| Fagundes 2009 [40]        | low                 | unclear                | high                 | low                  | low             | low                 | unclear/high         |
| Frankenberger 2014 [41]   | unclear             | unclear                | high                 | low                  | low             | low                 | unclear/high         |
| Gallo 2010 [42]           | low                 | unclear                | high                 | unclear              | high            | low                 | unclear/high         |
| Gianordoli Neto 2008 [43] | unclear             | unclear                | high                 | low                  | loe             | low                 | unclear/high         |
| Goncalves 2013 [44]       | low                 | unclear                | high                 | low                  | low             | low                 | unclear/high         |
| Gresnigt 2012 [45]        | unclear             | unclear                | high                 | low                  | low             | low                 | unclear/high         |
| Häfer 2013 [46]           | unclear             | unclear                | high                 | high                 | low             | low                 | unclear/high         |
| Häfer 2015 [47]           | unclear             | unclear                | high                 | unclear              | low             | low                 | unclear/high         |
| Jyothi 2011 [48]          | unclear             | unclear                | high                 | low                  | low             | low                 | unclear/high         |
| Karaman 2012 [49]         | unclear             | unclear                | high                 | low                  | low             | low                 | unclear/high         |
| Kim 2009 [50]             | unclear             | unclear                | high                 | low                  | low             | low                 | unclear/high         |
| Koubi 2006 [51]           | unclear             | unclear                | high                 | low                  | high            | high                | unclear/high         |
| Krämer 2006 [52]          | unclear             | unclear                | high                 | unclear              | low             | low                 | unclear/high         |
| Kubo 2006 [53]            | unclear             | unclear                | high                 | low                  | low             | low                 | unclear/high         |
| Kubo 2009 [54]            | unclear             | unclear                | high                 | low                  | low             | low                 | unclear/high         |
| Kubo 2010 [55]            | low                 | unclear                | high                 | low                  | low             | low                 | unclear/high         |
| Kurokawa 2007 [56]        | unclear             | unclear                | high                 | unclear              | low             | low                 | unclear/high         |
| Logueicio 2007 [57]       | low                 | unclear                | high                 | unclear              | low             | low                 | unclear/high         |
| Loguercio 2007 [58]       | unclear             | unclear                | high                 | low                  | low             | low                 | unclear/high         |
| Mahmoud 2008 [59]         | unclear             | unclear                | high                 | unclear              | low             | low                 | unclear/high         |
| Mahmoud 2014 [60]         | unclear             | unclear                | high                 | unclear              | low             | low                 | unclear/high         |
| Mahmoud 2014 [61]         | low                 | unclear                | high                 | low                  | low             | low                 | unclear/high         |
| Manhart 2010 [62]         | low                 | unclear                | high                 | low                  | low             | low                 | unclear/high         |
| Monteiro 2010 [63]        | unclear             | unclear                | high                 | high                 | low             | low                 | unclear/high         |
| Moosavi 2013 [64]         | unclear             | unclear                | high                 | low                  | low             | low                 | unclear/high         |
| Moretto 2013 [65]         | low                 | unclear                | high                 | low                  | low             | low                 | unclear/high         |
| Pascon 2006 [66]          | low                 | unclear                | high                 | low                  | low             | low                 | unclear/high         |
| Paula 2015 [67]           | low                 | low                    | high                 | low                  | low             | low                 | unclear/high         |
| Pazinatto 2012 [68]       | low                 | unclear                | high                 | low                  | low             | low                 | unclear/high         |
| Perdigao 2005 [69]        | unclear             | unclear                | high                 | low                  | low             | low                 | unclear/high         |
| Perdigao 2009 [70]        | unclear             | unclear                | high                 | low                  | low             | low                 | unclear/high         |
| Perdigao 2012 [71]        | unclear             | unclear                | high                 | low                  | low             | low                 | unclear/high         |
| Perdigao 2012 [72]        | unclear             | unclear                | high                 | high                 | low             | low                 | unclear/high         |
| Peumans 2012 [73]         | low                 | unclear                | high                 | low                  | high            | low                 | unclear/high         |
| Pollington 2008 [74]      | low                 | unclear                | high                 | high                 | low             | low                 | unclear/high         |
| Poon 2005 [75]            | unclear             | unclear                | high                 | unclear              | low             | low                 | unclear/high         |
| Qin 2013 [76]             | unclear             | unclear                | high                 | low                  | low             | low                 | unclear/high         |

Table S2. Cont.

| Trial ID                 | Sequence Generation | Allocation Concealment | Blinding of Operator | Blinding of Examiner | Incomplete Data | Selective Reporting | Overall Risk of Bias |
|--------------------------|---------------------|------------------------|----------------------|----------------------|-----------------|---------------------|----------------------|
| Reis 2009 [77]           | low                 | unclear                | high                 | high                 | low             | low                 | unclear/high         |
| Reis 2009 [78]           | low                 | unclear                | high                 | low                  | low             | low                 | unclear/high         |
| Ritter 2009 [79]         | low                 | unclear                | high                 | unclear              | low             | low                 | unclear/high         |
| Saboia 2006 [80]         | unclear             | unclear                | high                 | low                  | low             | low                 | unclear/high         |
| Sadeghi 2010 [81]        | unclear             | unclear                | high                 | low                  | low             | low                 | unclear/high         |
| Santiago 2010 [82]       | unclear             | unclear                | high                 | high                 | low             | low                 | unclear/high         |
| Schattenberg 2008 [83]   | unclear             | unclear                | high                 | unclear              | low             | low                 | unclear/high         |
| Schirrmeister 2009 [84]  | low                 | unclear                | high                 | low                  | low             | low                 | unclear/high         |
| Schmidt 2014 [85]        | low                 | unclear                | high                 | low                  | low             | low                 | unclear/high         |
| Shi 2010 [86]            | low                 | unclear                | high                 | low                  | low             | low                 | unclear/high         |
| Söderholm 2013 [87]      | low                 | unclear                | high                 | unclear              | low             | low                 | unclear/high         |
| Stojanac 2013 [88]       | unclear             | unclear                | high                 | low                  | low             | low                 | unclear/high         |
| Torres 2010 [89]         | unclear             | unclear                | high                 | unclear              | high            | high                | unclear/high         |
| Tuncer 2013 [90]         | low                 | low                    | high                 | low                  | low             | low                 | low                  |
| Tuncer 2014 [91]         | unclear             | unclear                | high                 | low                  | low             | low                 | unclear/high         |
| Türkün 2005 [92]         | unclear             | unclear                | high                 | unclear              | low             | low                 | unclear/high         |
| Türkün 2008 [93]         | unclear             | unclear                | high                 | unclear              | low             | low                 | unclear/high         |
| Turner 2008 [94]         | unclear             | unclear                | high                 | low                  | low             | low                 | unclear/high         |
| van Dijken 2005 [95]     | unclear             | unclear                | high                 | unclear              | low             | low                 | unclear/high         |
| van Dijken 2006 [96]     | unclear             | unclear                | high                 | low                  | low             | low                 | unclear/high         |
| van Dijken 2007 [97]     | unclear             | unclear                | high                 | unclear              | low             | low                 | unclear/high         |
| van Dijken 2008 [98]     | unclear             | unclear                | high                 | unclear              | low             | low                 | unclear/high         |
| van Dijken 2009 [99]     | unclear             | unclear                | high                 | unclear              | low             | low                 | unclear/high         |
| van Dijken 2010 [100]    | unclear             | unclear                | unclear              | unclear              | low             | low                 | unclear/high         |
| van Dijken 2012 [101]    | low                 | unclear                | high                 | low                  | low             | low                 | unclear/high         |
| van Dijken 2013 [102]    | unclear             | unclear                | high                 | high                 | low             | low                 | unclear/high         |
| van Dijken 2013 [103]    | unclear             | unclear                | high                 | low                  | low             | low                 | unclear/high         |
| van Dijken 2014 [104]    | low                 | unclear                | high                 | low                  | low             | low                 | unclear/high         |
| van Dijken 2014 [105]    | low                 | unclear                | high                 | high                 | low             | low                 | unclear/high         |
| van Dijken 2014 [106]    | low                 | unclear                | high                 | low                  | low             | low                 | unclear/high         |
| van Dijken 2015 [107]    | low                 | unclear                | high                 | low                  | low             | low                 | unclear/high         |
| van Landuyt 2014 [108]   | low                 | unclear                | high                 | low                  | low             | low                 | unclear/high         |
| Yaman 2014 [109]         | unclear             | unclear                | high                 | low                  | low             | low                 | unclear/high         |
| Yazici 2014 [110]        | low                 | unclear                | high                 | low                  | low             | low                 | unclear/high         |
| Zander-Grande 2011 [111] | unclear             | unclear                | high                 | low                  | low             | low                 | unclear/high         |
| Zander-Grande 2014 [112] | low                 | low                    | high                 | low                  | low             | low                 | low                  |
| Zhou 2009 [113]          | low                 | unclear                | high                 | low                  | low             | low                 | unclear/high         |
| Zulfikaroglu 2008 [114]  | unclear             | unclear                | high                 | low                  | low             | low                 | unclear/high         |



## References

1. Adeleke; Oginni, A. Clinical evaluation of resin composite and resin-modified glass ionomer cement in non-cariou cervical lesions. *J. West Afr. Coll. Surg.* **2012**, *2*, 21–37.
2. Ahrari, F.; Nojoomian, M.; Moosavi, H. Clinical evaluation of bonded amalgam restorations in endodontically treated premolar teeth: A one-year evaluation. *J. Contemp. Dent. Pract.* **2010**, *11*, 9–16.
3. Alves dos Santos, M.P.; Luiz, R.R.; Maia, L.C. Randomised trial of resin-based restorations in class I and class II beveled preparations in primary molars: 48-month results. *J. Dent.* **2010**, *38*, 451–459.
4. Andersson-Wenckert, I.; Sunnegardh-Gronberg, K. Flowable resin composite as a class II restorative in primary molars: A two-year clinical evaluation. *Acta Odontol. Scand.* **2006**, *64*, 334–340.
5. Aw, T.C.; Lepe, X.; Johnson, G.H.; Mancl, L.A. A three-year clinical evaluation of two-bottle *versus* one-bottle dentin adhesives. *J. Am. Dent. Assoc.* **2005**, *136*, 311–322.
6. Baracco, B.; Perdigao, J.; Cabrera, E.; Ceballos, L. Two-year clinical performance of a low-shrinkage composite in posterior restorations. *Oper. Dent.* **2013**, *38*, 591–600.
7. Beck, F.; Dumitrescu, N.; Konig, F.; Graf, A.; Bauer, P.; Sperr, W.; Moritz, A.; Schedle, A. One-year evaluation of two hybrid composites placed in a randomized-controlled clinical trial. *Dent. Mater.* **2014**, *30*, 824–838.
8. Blunck, U.; Knitter, K.; Jahn, K.R. Six-month clinical evaluation of XP BOND in noncariou cervical lesions. *J. Adhes. Dent.* **2007**, *9* (Suppl. 2), 265–268.
9. Boeckler, A.; Boeckler, L.; Eppendorf, K.; Schaller, H.G.; Gernhardt, C.R. A prospective, randomized clinical trial of a two-step self-etching *vs.* two-step etch-and-rinse adhesive and sem margin analysis: Four-year results. *J. Adhes. Dent.* **2012**, *14*, 585–592.
10. Bottenberg, P.; Jacquet, W.; Alaerts, M.; Keulemans, F. A prospective randomized clinical trial of one bis-GMA-based and two ormocer-based composite restorative systems in class II cavities: Five-year results. *J. Dent.* **2009**, *37*, 198–203.
11. Brackett, W.W.; Browning, W.D.; Brackett, M.G.; Callan, R.S.; Blalock, J.S. Effect of restoration size on the clinical performance of posterior “packable” resin composites over 18 months. *Oper. Dent.* **2007**, *32*, 212–216.
12. Brackett, M.G.; Dib, A.; Franco, G.; Estrada, B.E.; Brackett, W.W. Two-year clinical performance of clearfil SE and clearfil S3 in restoration of unabraded non-cariou class V lesions. *Oper. Dent.* **2010**, *35*, 273–278.
13. Burgess, J.O.; Sadid-Zadeh, R.; Cakir, D.; Ramp, L.C. Clinical evaluation of self-etch and total-etch adhesive systems in noncariou cervical lesions: A two-year report. *Oper. Dent.* **2013**, *38*, 477–487.
14. Burrow, M.F.; Tyas, M.J. Clinical evaluation of three adhesive systems for the restoration of non-cariou cervical lesions. *Oper. Dent.* **2007**, *32*, 11–15.
15. Burrow, M.F.; Tyas, M.J. Comparison of two all-in-one adhesives bonded to non-cariou cervical lesions—Results at 3 years. *Clin. Oral Investig.* **2012**, *16*, 1089–1094.
16. Casagrande, L.; Dalpian, D.M.; Ardenghi, T.M.; Zanatta, F.B.; Balbinot, C.E.; Garcia-Godoy, F.; De Araujo, F.B. Randomized clinical trial of adhesive restorations in primary molars. 18-month results. *Am. J. Dent.* **2013**, *26*, 351–355.
17. Cehreli, Z.C.; Cetinguc, A.; Cengiz, S.B.; Altay, A.N. Clinical performance of pulpotomized primary molars restored with resin-based materials. 24-month results. *Am. J. Dent.* **2006**, *19*, 262–266.
18. Celik, C.; Ozgunaltay, G.; Attar, N. Clinical evaluation of flowable resins in non-cariou cervical lesions: Two-year results. *Oper. Dent.* **2007**, *32*, 313–321.
19. Celik, C.; Arhun, N.; Yamanel, K. Clinical evaluation of resin-based composites in posterior restorations: A 3-year study. *Med. Princ. Pract.* **2014**, *23*, 453–459.
20. Cetin, A.R.; Unlu, N.; Cobanoglu, N. A five-year clinical evaluation of direct nanofilled and indirect composite resin restorations in posterior teeth. *Oper. Dent.* **2013**, *38*, E1–E11.
21. Dalton Bittencourt, D.; Ezecelevski, I.G.; Reis, A.; Van Dijken, J.W.; Loguercio, A.D. An 18-months’ evaluation of self-etch and etch & rinse adhesive in non-cariou cervical lesions. *Acta Odontol. Scand.* **2005**, *63*, 173–178.
22. Daou, M.H.; Tavernier, B.; Meyer, J.M. Two-year clinical evaluation of three restorative materials in primary molars. *J. Clin. Pediatr. Dent.* **2009**, *34*, 53–58.
23. Daou, M.H.; Attin, T.; Gohring, T.N. Clinical success of compomer and amalgam restorations in primary molars. Follow up in 36 months. *Schweiz. Monatsschr. Zahnmed.* **2009**, *119*, 1082–1088.
24. De Andrade, A.K.; Duarte, R.M.; Medeiros e Silva, F.D.; Batista, A.U.; Lima, K.C.; Monteiro, G.Q.; Montes, M.A. Resin composite class I restorations: A 54-month randomized clinical trial. *Oper. Dent.* **2014**, *39*, 588–594.

25. Delbons, F.B.; Perdigao, J.; Araujo, E.; Melo Freire, C.A.; Caldas, D.D.; Cardoso, J.L.; Pagani, M.; Borges, G.A.; Lima, R.B. Randomized clinical trial of four adhesion strategies in posterior restorations-18-month results. *J. Esthet. Restor. Dent.* **2015**, *27*, 107–117.
26. Deliperi, S.; Bardwell, D.N.; Alleman, D. Clinical evaluation of stress-reducing direct composite restorations in structurally compromised molars: A 2-year report. *Oper. Dent.* **2012**, *37*, 109–116.
27. Demirci, M.; Yildiz, E.; Uysal, O. Comparative clinical evaluation of different treatment approaches using a microfilled resin composite and a compomer in class iii cavities: Two-year results. *Oper. Dent.* **2008**, *33*, 7–14.
28. Dall'Orologio, G.D.; Lorenzi, R. Restorations in abrasion/erosion cervical lesions: 8-year results of a triple blind randomized controlled trial. *Am. J. Dent.* **2014**, *27*, 245–250.
29. Dresch, W.; Volpato, S.; Gomes, J.C.; Ribeiro, N.R.; Reis, A.; Loguercio, A.D. Clinical evaluation of a nanofilled composite in posterior teeth: 12-month results. *Oper. Dent.* **2006**, *31*, 409–417.
30. Dunne, S.M.; Abraham, R.; Pankhurst, C.L. A 3-year longitudinal, controlled clinical study of a gallium-based restorative material. *Br. Dent. J.* **2005**, *198*, 355–359.
31. Dutra-Correa, M.; Saraceni, C.H.; Ciaramicoli, M.T.; Kiyani, V.H.; Queiroz, C.S. Effect of chlorhexidine on the 18-month clinical performance of two adhesives. *J. Adhes. Dent.* **2013**, *15*, 287–292.
32. Efes, B.G.; Dörter, C.; Gomec, Y.; Koray, F. Two-year clinical evaluation of ormocer and nanofill composite with and without a flowable liner. *J. Adhes. Dent.* **2006**, *8*, 119–126.
33. Efes, B.G.; Dörter, C.; Gomec, Y. Clinical evaluation of an ormocer, a nanofill composite and a hybrid composite at 2 years. *Am. J. Dent.* **2006**, *19*, 236–240.
34. Efes, B.G.; Yaman, B.C.; Gurbuz, O.; Gumustas, B. Randomized controlled trial of the 2-year clinical performance of a silorane-based resin composite in class 1 posterior restorations. *Am. J. Dent.* **2013**, *26*, 33–38.
35. Eliguzeloglu Dalkilic, E.; Omurlu, H. Two-year clinical evaluation of three adhesive systems in non-cariou cervical lesions. *J. Appl. Oral Sci.* **2012**, *20*, 192–199.
36. Ergucu, Z.; Turkun, L.S. Clinical performance of novel resin composites in posterior teeth: 18-month results. *J. Adhes. Dent.* **2007**, *9*, 209–216.
37. Ermis, R.B.; Van Landuyt, K.L.; Cardoso, M.V.; De Munck, J.; Van Meerbeek, B.; Peumans, M. Clinical effectiveness of a one-step self-etch adhesive in non-cariou cervical lesions at 2 years. *Clin. Oral Investig.* **2012**, *16*, 889–897.
38. Ernst, C.P.; Brandenbusch, M.; Meyer, G.; Canbek, K.; Gottschalk, F.; Willershausen, B. Two-year clinical performance of a nanofiller vs a fine-particle hybrid resin composite. *Clin. Oral Investig.* **2006**, *10*, 119–125.
39. Ertugrul, F.; Cogulu, D.; Ozdemir, Y.; Ersin, N. Comparison of conventional *versus* colored compomers for class II restorations in primary molars: A 12-month clinical study. *Med. Princ. Pract.* **2010**, *19*, 148–152.
40. Fagundes, T.C.; Barata, T.J.; Carvalho, C.A.; Franco, E.B.; van Dijken, J.W.; Navarro, M.F. Clinical evaluation of two packable posterior composites: A five-year follow-up. *J. Am. Dent. Assoc.* **2009**, *140*, 447–454.
41. Frankenberger, R.; Reinelt, C.; Kramer, N. Nanohybrid *vs.* Fine hybrid composite in extended class II cavities: 8-year results. *Clin. Oral Investig.* **2014**, *18*, 125–137.
42. Gallo, J.R.; Burgess, J.O.; Ripps, A.H.; Walker, R.S.; Maltezos, M.B.; Mercante, D.E.; Davidson, J.M. Three-year clinical evaluation of two flowable composites. *Quintessence Int.* **2010**, *41*, 497–503.
43. Gianordoli Neto, R.; Santiago, S.L.; Mendonca, J.S.; Passos, V.F.; Lauris, J.R.; Navarro, M.F. One year clinical evaluation of two different types of composite resins in posterior teeth. *J. Contemp. Dent. Pract.* **2008**, *9*, 26–33.
44. Goncalves, F.S.; Leal, C.D.; Bueno, A.C.; Freitas, A.B.; Moreira, A.N.; Magalhaes, C.S. A double-blind randomized clinical trial of a silorane-based resin composite in class 2 restorations: 18-month follow-up. *Am. J. Dent.* **2013**, *26*, 93–98.
45. Gresnigt, M.M.; Kalk, W.; Ozcan, M. Randomized controlled split-mouth clinical trial of direct laminate veneers with two micro-hybrid resin composites. *J. Dent.* **2012**, *40*, 766–775.
46. Hafer, M.; Schneider, H.; Rupf, S.; Busch, I.; Fuchss, A.; Merte, I.; Jentsch, H.; Haak, R.; Merte, K. Experimental and clinical evaluation of a self-etching and an etch-and-rinse adhesive system. *J. Adhes. Dent.* **2013**, *15*, 275–286.
47. Hafer, M.; Jentsch, H.; Haak, R.; Schneider, H. A three-year clinical evaluation of a one-step self-etch and a two-step etch-and-rinse adhesive in non-cariou cervical lesions. *J. Dent.* **2015**, *43*, 350–361.

48. Jyothi, K.; Annapurna, S.; Kumar, A.S.; Venugopal, P.; Jayashankara, C. Clinical evaluation of giomer- and resin-modified glass ionomer cement in class v noncarious cervical lesions: An *in vivo* study. *J. Conserv. Dent.* **2011**, *14*, 409–413.
49. Karaman, E.; Yazici, A.R.; Ozgunaltay, G.; Dayangac, B. Clinical evaluation of a nanohybrid and a flowable resin composite in non-cariou cervical lesions: 24-month results. *J. Adhes. Dent.* **2012**, *14*, 485–492.
50. Kim, S.Y.; Lee, K.W.; Seong, S.R.; Lee, M.A.; Lee, I.B.; Son, H.H.; Kim, H.Y.; Oh, M.H.; Cho, B.H. Two-year clinical effectiveness of adhesives and retention form on resin composite restorations of non-cariou cervical lesions. *Oper. Dent.* **2009**, *34*, 507–515.
51. Koubi, S.; Raskin, A.; Bukiet, F.; Pignoly, C.; Toca, E.; Tassery, H. One-year clinical evaluation of two resin composites, two polymerization methods, and a resin-modified glass ionomer in non-cariou cervical lesions. *J. Contemp. Dent. Pract.* **2006**, *7*, 42–53.
52. Kramer, N.; Garcia-Godoy, F.; Reinelt, C.; Frankenberger, R. Clinical performance of posterior compomer restorations over 4 years. *Am. J. Dent.* **2006**, *19*, 61–66.
53. Kubo, S.; Kawasaki, K.; Yokota, H.; Hayashi, Y. Five-year clinical evaluation of two adhesive systems in non-cariou cervical lesions. *J. Dent.* **2006**, *34*, 97–105.
54. Kubo, S.; Yokota, H.; Yokota, H.; Hayashi, Y. Two-year clinical evaluation of one-step self-etch systems in non-cariou cervical lesions. *J. Dent.* **2009**, *37*, 149–155.
55. Kubo, S.; Yokota, H.; Yokota, H.; Hayashi, Y. Three-year clinical evaluation of a flowable and a hybrid resin composite in non-cariou cervical lesions. *J. Dent.* **2010**, *38*, 191–200.
56. Kurokawa, H.; Miyazaki, M.; Takamizawa, T.; Rikuta, A.; Tsubota, K.; Uekusa, S. One-year clinical evaluation of five single-step self-etch adhesive systems in non-cariou cervical lesions. *Dent. Mater. J.* **2007**, *26*, 14–20.
57. Loguercio, A.D.; Bittencourt, D.D.; Baratieri, L.N.; Reis, A. A 36-month evaluation of self-etch and etch-and-rinse adhesives in noncarious cervical lesions. *J. Am. Dent. Assoc.* **2007**, *138*, 507–514.
58. Loguercio, A.D.; Lorini, E.; Weiss, R.V.; Tori, A.P.; Picinatto, C.C.; Ribeiro, N.R.; Reis, A. A 12-month clinical evaluation of composite resins in class iii restorations. *J. Adhes. Dent.* **2007**, *9*, 57–64.
59. Mahmoud, S.H.; El-Embaby, A.E.; AbdAllah, A.M.; Hamama, H.H. Two-year clinical evaluation of ormocer, nanohybrid and nanofill composite restorative systems in posterior teeth. *J. Adhes. Dent.* **2008**, *10*, 315–322.
60. Mahmoud, S.H.; El-Embaby, A.E.; AbdAllah, A.M. Clinical performance of ormocer, nanofilled, and nanoceramic resin composites in class I and class II restorations: A three-year evaluation. *Oper. Dent.* **2014**, *39*, 32–42.
61. Mahmoud, S.H.; Ali, A.K.; Hegazi, H.A. A three-year prospective randomized study of silorane- and methacrylate-based composite restorative systems in class II restorations. *J. Adhes. Dent.* **2014**, *16*, 285–292.
62. Manhart, J.; Chen, H.Y.; Hickel, R. Clinical evaluation of the posterior composite quixfil in class I and II cavities: 4-year follow-up of a randomized controlled trial. *J. Adhes. Dent.* **2010**, *12*, 237–243.
63. Monteiro, P.M.; Manso, M.C.; Gavinha, S.; Melo, P. Two-year clinical evaluation of packable and nanostructured resin-based composites placed with two techniques. *J. Am. Dent. Assoc.* **2010**, *141*, 319–329.
64. Moosavi, H.; Kimyai, S.; Forghani, M.; Khodadadi, R. The clinical effectiveness of various adhesive systems: An 18-month evaluation. *Oper. Dent.* **2013**, *38*, 134–141.
65. Moretto, S.G.; Russo, E.M.; Carvalho, R.C.; De Munck, J.; Van Landuyt, K.; Peumans, M.; Van Meerbeek, B.; Cardoso, M.V. 3-year clinical effectiveness of one-step adhesives in non-cariou cervical lesions. *J. Dent.* **2013**, *41*, 675–682.
66. Pascon, F.M.; Kantovitz, K.R.; Caldo-Teixeira, A.S.; Borges, A.F.; Silva, T.N.; Puppini-Rontani, R.M.; Garcia-Godoy, F. Clinical evaluation of composite and compomer restorations in primary teeth: 24-month results. *J. Dent.* **2006**, *34*, 381–388.
67. Paula, E.A.; Tay, L.Y.; Kose, C.; Mena-Serrano, A.; Reis, A.; Perdigao, J.; Loguercio, A.D. Randomized clinical trial of four adhesion strategies in cervical lesions: 12-month results. *Int. J. Esthet. Dent.* **2015**, *10*, 122–145.
68. Pazinato, F.B.; Gionordoli Neto, R.; Wang, L.; Mondelli, J.; Mondelli, R.F.; Navarro, M.F. 56-month clinical performance of class I and II resin composite restorations. *J. Appl. Oral Sci.* **2012**, *20*, 323–328.
69. Perdigao, J.; Carmo, A.R.; Geraldini, S. Eighteen-month clinical evaluation of two dentin adhesives applied on dry vs moist dentin. *J. Adhes. Dent.* **2005**, *7*, 253–258.

70. Perdigao, J.; Dutra-Correa, M.; Anauate-Netto, C.; Castilhos, N.; Carmo, A.R.; Lewgoy, H.R.; Amore, R.; Cordeiro, H.J. Two-year clinical evaluation of self-etching adhesives in posterior restorations. *J. Adhes. Dent.* **2009**, *11*, 149–159.
71. Perdigao, J.; Dutra-Correa, M.; Saraceni, C.H.; Ciaramicoli, M.T.; Kiyani, V.H.; Queiroz, C.S. Randomized clinical trial of four adhesion strategies: 18-month results. *Oper. Dent.* **2012**, *37*, 3–11.
72. Perdigao, J.; Dutra-Correa, M.; Saraceni, S.H.; Ciaramicoli, M.T.; Kiyani, V.H. Randomized clinical trial of two resin-modified glass ionomer materials: 1-year results. *Oper. Dent.* **2012**, *37*, 591–601.
73. Peumans, M.; De Munck, J.; Van Landuyt, K.L.; Poitevin, A.; Lambrechts, P.; Van Meerbeek, B. A 13-year clinical evaluation of two three-step etch-and-rinse adhesives in non-carious class-v lesions. *Clin. Oral Investig.* **2012**, *16*, 129–137.
74. Pollington, S.; van Noort, R. A clinical evaluation of a resin composite and a compomer in non-carious class V lesions. A 3-year follow-up. *Am. J. Dent.* **2008**, *21*, 49–52.
75. Poon, E.C.; Smales, R.J.; Yip, K.H. Clinical evaluation of packable and conventional hybrid posterior resin-based composites: Results at 3.5 years. *J. Am. Dent. Assoc.* **2005**, *136*, 1533–1540.
76. Qin, W.; Song, Z.; Ye, Y.Y.; Lin, Z.M. Two-year clinical evaluation of composite resins in non-carious cervical lesions. *Clin. Oral Investig.* **2013**, *17*, 799–804.
77. Reis, A.; Leite, T.M.; Matte, K.; Michels, R.; Amaral, R.C.; Geraldini, S.; Loguercio, A.D. Improving clinical retention of one-step self-etching adhesive systems with an additional hydrophobic adhesive layer. *J. Am. Dent. Assoc.* **2009**, *140*, 877–885.
78. Reis, A.; Loguercio, A.D. A 36-month clinical evaluation of ethanol/water and acetone-based etch-and-rinse adhesives in non-carious cervical lesions. *Oper. Dent.* **2009**, *34*, 384–391.
79. Ritter, A.V.; Swift, E.J., Jr.; Heymann, H.O.; Sturdevant, J.R.; Wilder, A.D., Jr. An eight-year clinical evaluation of filled and unfilled one-bottle dental adhesives. *J. Am. Dent. Assoc.* **2009**, *140*, 28–37.
80. Saboia Vde, P.; Almeida, P.C.; Rittet, A.V.; Swift, E.J., Jr.; Pimenta, L.A. 2-year clinical evaluation of sodium hypochlorite treatment in the restoration of non-carious cervical lesions: A pilot study. *Oper. Dent.* **2006**, *31*, 530–535.
81. Sadeghi, M.; Lynch, C.D.; Shahamat, N. Eighteen-month clinical evaluation of microhybrid, packable and nanofilled resin composites in class I restorations. *J. Oral Rehabil.* **2010**, *37*, 532–537.
82. Santiago, S.L.; Passos, V.F.; Vieira, A.H.; Navarro, M.F.; Lauris, J.R.; Franco, E.B. Two-year clinical evaluation of resinous restorative systems in non-carious cervical lesions. *Braz. Dent. J.* **2010**, *21*, 229–234.
83. Schattenberg, A.; Werling, U.; Willershausen, B.; Ernst, C.P. Two-year clinical performance of two one-step self-etching adhesives in the restoration of cervical lesions. *Clin. Oral Investig.* **2008**, *12*, 225–232.
84. Schirrmeister, J.F.; Huber, K.; Hellwig, E.; Hahn, P. Four-year evaluation of a resin composite including nanofillers in posterior cavities. *J. Adhes. Dent.* **2009**, *11*, 399–404.
85. Schmidt, M.; Dige, I.; Kirkevang, L.L.; Vaeth, M.; Horsted-Bindslev, P. Five-year evaluation of a low-shrinkage silorane resin composite material: A randomized clinical trial. *Clin. Oral Investig.* **2015**, *19*, 245–251.
86. Shi, L.; Wang, X.; Zhao, Q.; Zhang, Y.; Zhang, L.; Ren, Y.; Chen, Z. Evaluation of packable and conventional hybrid resin composites in class I restorations: Three-year results of a randomized, double-blind and controlled clinical trial. *Oper. Dent.* **2010**, *35*, 11–19.
87. Soderholm, K.J.; Ottenga, M.; Nimmo, S. Four-year clinical evaluation of two self-etching dentin adhesives of different pH values used to restore non-retentive cervical lesions. *Am. J. Dent.* **2013**, *26*, 28–32.
88. Stojanac, I.L.; Premovic, M.T.; Ramic, B.D.; Drobac, M.R.; Stojasin, I.M.; Petrovic, L.M. Noncarious cervical lesions restored with three different tooth-colored materials: Two-year results. *Oper. Dent.* **2013**, *38*, 12–20.
89. Torres, C.R.; Borges, A.B.; Goncalves, S.E.; Pucci, C.R.; de Araujo, M.A.; Barcellos, D.C. Clinical evaluation of two packable resin-based composite restorations: A three-year report. *Gen. Dent.* **2010**, *58*, 338–343.
90. Tuncer, D.; Yazici, A.R.; Ozgunaltay, G.; Dayangac, B. Clinical evaluation of different adhesives used in the restoration of non-carious cervical lesions: 24-month results. *Aust. Dent. J.* **2013**, *58*, 94–100.
91. Tuncer, D.; Celik, C.; Yamanel, K.; Arhun, N. 1 year clinical evaluation of microhybrid composites used in the restoration of non-carious cervical lesions. *Oral Health Dent. Manag.* **2014**, *13*, 366–371.
92. Turkun, L.S. The clinical performance of one- and two-step self-etching adhesive systems at one year. *J. Am. Dent. Assoc.* **2005**, *136*, 656–664.
93. Turkun, L.S.; Celik, E.U. Noncarious class v lesions restored with a polyacid modified resin composite and a nanocomposite: A two-year clinical trial. *J. Adhes. Dent.* **2008**, *10*, 399–405.

94. Turner, E.W.; Shook, L.W.; Ross, J.A.; deRijk, W.; Eason, B.C. Clinical evaluation of a flowable resin composite in non-carious class V lesions: Two-year results. *J. Tenn. Dent. Assoc.* **2008**, *88*, 20–24.
95. Van Dijken, J.W. Retention of a resin-modified glass ionomer adhesive in non-carious cervical lesions. A 6-year follow-up. *J. Dent.* **2005**, *33*, 541–547.
96. Van Dijken, J.W.; Sunnegardh-Gronberg, K. Fiber-reinforced packable resin composites in class II cavities. *J. Dent.* **2006**, *34*, 763–769.
97. Van Dijken, J.W.; Sunnegardh-Gronberg, K.; Lindberg, A. Clinical long-term retention of etch-and-rinse and self-etch adhesive systems in non-carious cervical lesions. A 13 years evaluation. *Dent. Mater.* **2007**, *23*, 1101–1107.
98. Van Dijken, J.W.; Pallesen, U. Long-term dentin retention of etch-and-rinse and self-etch adhesives and a resin-modified glass ionomer cement in non-carious cervical lesions. *Dent. Mater.* **2008**, *24*, 915–922.
99. Van Dijken, J.W.; Lindberg, A. Clinical effectiveness of a low-shrinkage resin composite: A five-year evaluation. *J. Adhes. Dent.* **2009**, *11*, 143–148.
100. Van Dijken, J.W. A prospective 8-year evaluation of a mild two-step self-etching adhesive and a heavily filled two-step etch-and-rinse system in non-carious cervical lesions. *Dent. Mater.* **2010**, *26*, 940–946.
101. Van Dijken, J.W.; Pallesen, U. A 7-year randomized prospective study of a one-step self-etching adhesive in non-carious cervical lesions. The effect of curing modes and restorative material. *J. Dent.* **2012**, *40*, 1060–1067.
102. Van Dijken, J.W. A randomized controlled 5-year prospective study of two hema-free adhesives, a 1-step self etching and a 3-step etch-and-rinse, in non-carious cervical lesions. *Dent. Mater.* **2013**, *29*, e271–e280.
103. Van Dijken, J.W. A 6-year prospective evaluation of a one-step hema-free self-etching adhesive in class II restorations. *Dent. Mater.* **2013**, *29*, 1116–1122.
104. Van Dijken, J.W.; Pallesen, U. A randomized controlled three year evaluation of “bulk-filled” posterior resin restorations based on stress decreasing resin technology. *Dent Mater.* **2014**, *30*, e245–e251.
105. Van Dijken, J.W.; Pallesen, U. Eight-year randomized clinical evaluation of class II nanohybrid resin composite restorations bonded with a one-step self-etch or a two-step etch-and-rinse adhesive. *Clin. Oral Investig.* **2015**, *19*, 1371–1379.
106. Van Dijken, J.W.; Pallesen, U. A randomized 10-year prospective follow-up of class II nanohybrid and conventional hybrid resin composite restorations. *J. Adhes. Dent.* **2014**, *16*, 585–592.
107. Van Dijken, J.W.; Pallesen, U. Randomized 3-year clinical evaluation of class I and II posterior resin restorations placed with a bulk-fill resin composite and a one-step self-etching adhesive. *J. Adhes. Dent.* **2015**, *17*, 81–88.
108. Van Landuyt, K.L.; De Munck, J.; Ermis, R.B.; Peumans, M.; Van Meerbeek, B. Five-year clinical performance of a hema-free one-step self-etch adhesive in noncarious cervical lesions. *Clin. Oral Investig.* **2014**, *18*, 1045–1052.
109. Yaman, B.C.; Dogruer, I.; Gumustas, B.; Efes, B.G. Three-year randomized clinical evaluation of a low-shrinkage silorane-based resin composite in non-carious cervical lesions. *Clin. Oral Investig.* **2014**, *18*, 1071–1079.
110. Yazici, A.R.; Ustunkol, I.; Ozgunaltay, G.; Dayangac, B. Three-year clinical evaluation of different restorative resins in class I restorations. *Oper. Dent.* **2014**, *39*, 248–255.
111. Zander-Grande, C.; Ferreira, S.Q.; da Costa, T.R.; Loguercio, A.D.; Reis, A. Application of etch-and-rinse adhesives on dry and rewet dentin under rubbing action: A 24-month clinical evaluation. *J. Am. Dent. Assoc.* **2011**, *142*, 828–835.
112. Zander-Grande, C.; Amaral, R.C.; Loguercio, A.D.; Barroso, L.P.; Reis, A. Clinical performance of one-step self-etch adhesives applied actively in cervical lesions: 24-month clinical trial. *Oper. Dent.* **2014**, *39*, 228–238.
113. Zhou, Z.; Yu, S.; Jiang, Y.; Lin, Y.; Xiong, Y.; Ni, L. A randomized, controlled clinical trial of one-step self-etching adhesive systems in non-carious cervical lesions. *Am. J. Dent.* **2009**, *22*, 235–240.
114. Zulfikaroglu, B.T.; Atac, A.S.; Cehreli, Z.C. Clinical performance of class II adhesive restorations in pulpextomized primary molars: 12-month results. *J. Dent. Child.* **2008**, *75*, 33–43.
